# Supplementary material for: Identification of the smallest peptide with a zwitterion as the global minimum: a first-principles study on arginine-containing peptides
Source: Royal Society of Chemistry journal article supplement (doi:10.1039/c7cp01380a), 2017-01-01
Supplement: c7cp01380a1.pdf [file c7cp01380a1.pdf]

## Electronic Supplementary Information for

### Identification of the smallest peptide with a zwitterion as the global minimum: a first-principles study on arginine-containing peptides

Hongbao Li,<sup>\*a</sup> Jun Jiang<sup>\*a</sup> and Yi Luo<sup>a, b</sup>

<sup>a</sup> Hefei National Laboratory for Physical Sciences at the Microscale, School of Chemistry and Materials Science, University of Science and Technology of China, Hefei, Anhui, 230026, China

<sup>b</sup> Guizhou Provincial Key Laboratory of Computational Nano-Material Science and Guizhou Synergetic Innovation Center of Scientific Big Data for Advanced Manufacturing Technology, Guizhou Normal College, Guiyang, Guizhou, 550018, China.

\*Correspondence to: lihb@mail.ustc.edu.cn, Jiangj1@ustc.edu.cn.

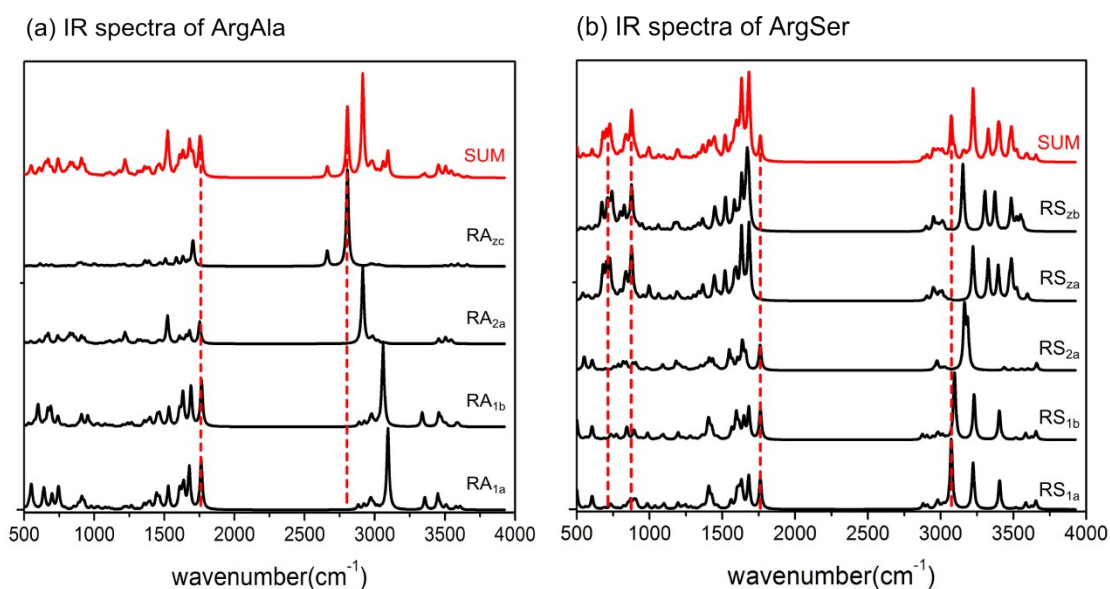

**Fig. S1** Simulated IR spectra of the most abundant conformers of the two arginine-containing peptides (a) ArgAla and (b) ArgSer at 298 K. A Lorentzian profile with a FWHM of 20  $\text{cm}^{-1}$  is used to convolute the calculated spectra.
